# Supplementary material
Source: MDPI journal article supplement (https://www.mdpi.com/2071-1050/14/11/6944)
Supplement: s1 [file s1]

Supplementary Information

# Nanogenerator-based Wireless Intelligent Motion Correction System for Storing Mechanical Energy of Human Motion

Yupeng Mao <sup>1,\*</sup>, Fengxin Sun <sup>1</sup>, Yongsheng Zhu <sup>1</sup>, Changjun Jia <sup>1</sup>, Tianming Zhao <sup>3</sup>, Chaorui Huang <sup>4</sup>, Caixia Li <sup>1</sup>, Ning Ba <sup>5</sup>, Tongtong Che <sup>2,5\*</sup>, Song Chen <sup>1,\*</sup>

- <sup>1</sup> Physical Education Department, Northeastern University, Shenyang 110819, China; 2171435@stu.neu.edu.cn (F.S.); 2001276@stu.neu.edu.cn (Y.Z.); 2071367@stu.neu.edu.cn (C.J.); 2101264@stu.neu.edu.cn (C.L.)
- <sup>2</sup> Capital University of Physical Education and Sport, Beijing 100191, China; chetongtong2018@cupes.edu.cn (T.C.)
- <sup>3</sup> College of Sciences, Northeastern University, Shenyang 110819, China; zhaotm@stumail.neu.edu.cn (T.Z.)
- <sup>4</sup> College of Information Science and Engineering, Northeastern University, Shenyang 110819, China; 20192732@stu.neu.edu.cn (C.H.)
- <sup>5</sup> Department of Sports Science and Physical Education, Tsinghua University, Beijing 100084, China; justbill@mail.tsinghua.edu.cn (N.B.)
- \* Correspondence: maoyupeng@pe.neu.edu.cn (Y.M.); chetongtong2018@cupes.edu.cn (T.C.); chensong@pe.neu.edu.cn (S.C.)

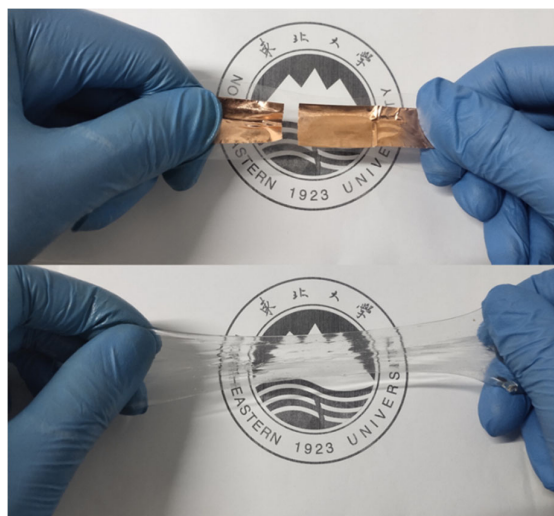

**Figure S1:** Comparison test of tensile properties of hydrogel electrode and copper electrode.

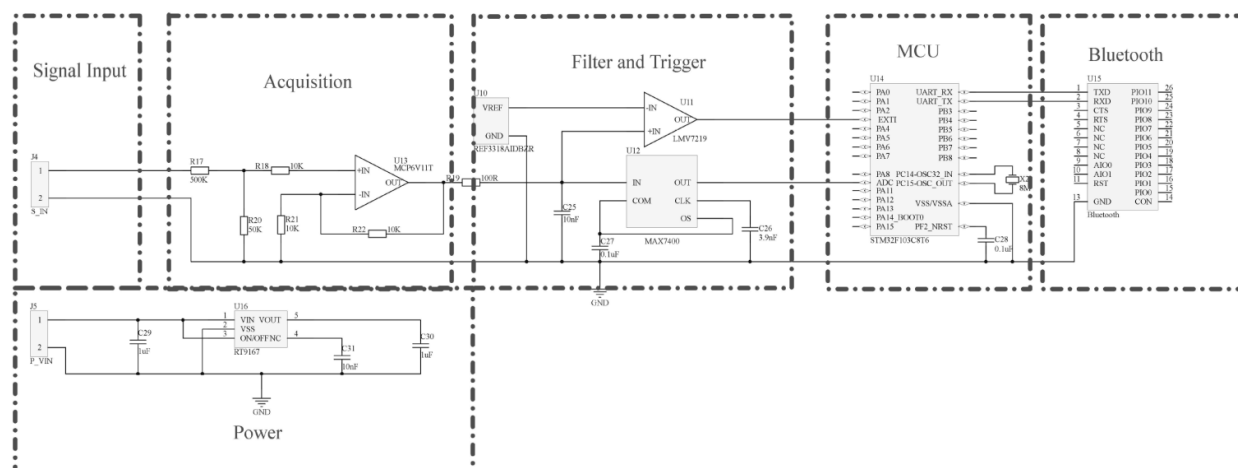

**Figure S2:** The circuit diagram of the wireless intelligent error correction system.

---

**Supplementary Video S1:** FL-TENG charges commercial calculators;

**Supplementary Video S2:** Biomechanical energy harvesting by FL-TENG;

**Supplementary Video S3:** Clap light up 122 LED lights process;

**Supplementary Video S4:** The display of the wireless intelligent motion error correction system.
